# Supplementary material
Source: PubMed Central journal article supplement (PMC1769554)
Supplement: NIHMS15713-supplement-HCCsupp.pdf [file NIHMS15713-supplement-HCCsupp.pdf]

# **SUPPLEMENTAL MATERIAL.**

**Transcriptomic and Genomic analysis of Human  
Hepatocellular Carcinomas and Hepatoblastomas.**

**Jian-Hua Luo, Baoguo Ren, Sergei Keryanov, George C.  
Tseng#, Uma N.M. Rao, Satdarshan P. Monga, Steven  
Strom, Anthony J. Demetris, Michael Nalesnik, Yan P.  
Yu, Sarangarajan Ranganathan and George K.  
Michalopoulos##**

**Department of Pathology, School of Medicine, and Biostatistics (#),  
Graduate School of Public Health, University of Pittsburgh, Pittsburgh,  
PA 15261**

## Materials and Methods

**Sample preparation:** Fresh liver tissues, recovered immediately from the operating room after removal, were dissected and trimmed to obtain pure tumor (completely free of normal hepatic tissue) or non-tumor liver tissues (free of tumor cells). Microdissection was coupled with sequential frozen and permanent section analyses to confirm the purity and homogeneity of the samples: gross and microscopic analyses were performed by pathologists. For tumor tissues, only samples with purity >90% were selected. For donor liver tissues, obtained at the time of organ-donation from brain-dead cadavers or live donors, samples free of any pathological alterations were selected, including cirrhosis or neoplastic and preneoplastic changes. For liver tissues adjacent to cancer, samples free of cancer cells, or any obvious dysplastic alterations, were selected. All tissues were processed and frozen within 30 minutes after removal. These tissues were then homogenized and subjected to analysis. All patients with hepatocellular carcinoma have at least a 5 years follow-up with regular evaluations for relapse or the presence of metastasis. Protocols for tissue banking, tissue anonymization and tissue processing were approved by institutional review board.

**Affymetrix chip analysis:** The overall analysis was conducted using Affymetrix chips u95av2, u95b and u95c.

**cRNA preparation:** Total RNA was extracted and purified with Qiagen RNeasy kit (Qiagen, San Diego, CA). Five micrograms of total RNA were used in the first strand cDNA synthesis with T7-d(T)<sub>24</sub> primer (GGCCAGTGAATTGTAATACGACTCACTATAGGGAGGCGG-(dT)<sub>24</sub>) by Superscript<sup>TM</sup> II (GIBCO-BRL, Rockville, MD). The second strand cDNA synthesis was carried out at 16°C by adding E. coli DNA ligase, E. coli DNA polymerase I and RnaseH in the reaction. This was followed by the addition of T4 DNA polymerase to blunt the ends of newly synthesized cDNA. The cDNA was purified through phenol/chloroform and ethanol precipitation. The purified cDNA were then incubated at 37°C for 4 hours in

an *in vitro* transcription reaction to produce cRNA labeled with biotin using MEGAscript™ system (Ambion, Inc, Austin, TX).

**Affymetrix chip hybridization:** Fifteen to 20 µg of cRNA were fragmented by incubating in a buffer containing 200 mM Tris-acetate, pH 8.1, 500 mM KOAc, 150 mM MgOAc at 95°C for 35 minutes. The fragmented cRNA were then hybridized with a pre-equilibrated Affymetrix chip at 45°C for 14-16 hours. After the hybridization cocktails were removed, the chips were then washed in a fluidic station with low-stringency buffer (6x SSPE, 0.01% Tween 20, 0.005% antifoam) for 10 cycles (2 mixes/cycle) and stringent buffer (100 mM MES, 0.1 M NaCl and 0.01% Tween 20) for 4 cycles (15 mixes/cycle), and stained with SAPE (Strepto-avidin Phycoerythrin). This was followed by incubation with biotinylated mouse anti-avidin antibody, and restained with SAPE. The chips were scanned in a HP ChipScanner (Affymetrix Inc, Santa Clara, CA) to detect hybridization signals. For quality assurance, all samples were run on Affymetrix test-3 chips to evaluate the integrity of RNA, samples with RNA 3'/5' ratios less than 2.5 were accepted for further analysis.

## **Data Analysis:**

### ***Preprocessing and filtering:***

Preprocessing including normalization and assessing expression intensity values were performed in dChip (<http://www.dchip.org>) software and expression intensity measurements were obtained for 37891 genes. It was noticed that intensity measurements under 100 in Affymetrix array are usually not reliable in previous reports and genes with expression intensity measurement of less than 100 were excluded in the calculations (1, 2). Such “filtering” resulted in 8398 remaining genes. We further filtered out genes with coefficient of variation (i.e. standard deviation divided by mean) less than 0.4. This resulted in 1496 genes used for further analysis. The expression values are then taken into logarithmic transformation (base 2). For sample hierarchical clustering, we performed a second filtering procedure to delete irrelevant genes. This follows previously published methodology (3), in which the tightest and most stable clusters are identified in a sequential manner through an analysis of the tendency of genes to be grouped together

under repeated re-sampling. Following this approach, a number of 419 genes in 15 clusters with tightly correlated patterns were identified. The remaining 1077 genes had a scattered distribution and low correlation with any other groups of genes. We thus filtered out the 1077 scattered genes and perform sample hierarchical clustering with the 419 tightly clustered genes.

***Detecting differentially expressed genes:***

The software SAM (Significance Analysis for Microarrays) (4) was used for detecting the number of differentially expressed genes required for definitive separation of two categories of tissues. The method applied a more robust version of t-statistics and utilized permutation analysis to assess the statistical significance while maintaining the inter-gene correlation structure. The multiple comparison problem (namely thousands of genes are simultaneously compared at the same time) was considered and integrated in the analysis (FDR controlled at 5%). The software is available from <http://www-stat.stanford.edu/~tibs/SAM> .

***Classification analysis:***

A nearest shrunken centroid methods (4) developed for microarray sample classification is used for developing and evaluating classification models that distinguishes normal vs. tumor groups, normal vs. adjacent groups, tumor vs. adjacent groups, and simultaneously classifying three groups. The method is modified from traditional nearest centroid classification method and in contrast to other traditional methods the gene selection procedure is embedded in the training of the classification model. By introducing the shrinkage threshold, random genes that contribute no discriminant power but induce random noises in the classification models are eliminated. Varying the shrinkage threshold will result in different number of genes involved in the classification model and different cross validation error rate. Ten-fold cross validation is applied to avoid over-fitting in error rate evaluation. More details of the method is described in the supplement material. We applied the software PAM (Prediction Analysis for Microarrays) publicly available from <http://www-stat.stanford.edu/~tibs/PAM/> to implement the method in our paper.

### ***Cluster analysis:***

Cluster analysis can be used to identify groups of genes (co-regulated genes) or groups of samples (subtypes of tumor) with similar expression pattern. Tight clustering (3) for clustering genes was applied as an unsupervised filtering procedure, as discussed above. The clustered genes are then used for hierarchical clustering of samples. Average linkage and Euclidean distance are used for hierarchical clustering throughout this paper.

### **Statistical analysis of differentially expressed individual genes between tumors, adjacent tissue and donor livers.**

Data for intensity expression of genes (based on analysis by algorithms provided by Affymetrix) in all tissue cases were assembled on a single Excel spreadsheet. Each column was a separate tissue sample and each row represented one gene. Comparison between different groups was done by statistical analysis of the difference of the means, using non-paired t-test. In further comparisons between different groups, data were sorted to eliminate genes in which the difference of the means between the compared groups was not statistically significant. To determine statistical significance, Benjamini-Hochberg procedure (5) is applied to account for multiple comparison (FDR=5%) and to prevent spurious appearance of statistical significance often occurring when a p-value of 0.05 is used across the board. Genes with p-value higher than that defined by the Benjamini-Hochberg procedure were not included in the calculations or discussed separately. The genes with statistically significant differences in expression were sorted by descending rank of the ratio of the mean between the two categories. This revealed the highest over-expressed and under-expressed genes for each comparison. Data are shown in Supplemental tables 1 to 8 and contain the ratio of the means, p-value of the difference of the means, and the gene identifiers (GenBank number, chromosome locus). EST sequences were not included in the tables.

### **Oligonucleotide genome array analysis.**

**Target DNA preparation.** Genomic DNA of the cell lines were extracted with QIAamp DNA mini kit (QIAGEN, CA), digested with *KpnI* and *NdeI* (New England Biolab, Boston). Two micrograms of DNA were amplified and labeled through PCR, using 5'-end Cy5 labeled random 12 mer for 50 cycle of the following sequence: 95°C for 30 seconds, 28°C 5 minute, 45 °C 5 minutes, 72 °C 3 minutes. To remove the residual primers and dNTP, the amplified DNA was purified through microcon YM-10 (Millipore, MA). The procedure followed the manufacturer's recommendation. To evaluate the completeness of deamination of cytosine, a PCR using primers corresponding to non-CpG island region of human  $\beta$ -actin was performed. The signal intensities of the wild type and the deaminated version of the same region were evaluated. It appeared that only at the pH 5.0 to 5.4, high ratios of deamination/wild type signals were achieved. The experiments of this set of data were performed at the condition of pH 5.0, a condition we considered optimal.

#### **Oligonucleotide genome array analysis.**

**Target DNA preparation.** Genomic DNA of the cell lines were extracted with QIAamp DNA mini kit (QIAGEN, CA), digested with *KpnI* and *NdeI* (New England Biolab, Boston). Two micrograms of DNA were amplified and labeled through PCR, using 5'-end Cy5 labeled random 12 mer for 50 cycle of the following sequence: 95°C for 30 seconds, 28°C 5 minute, 45 °C 5 minutes, 72 °C 3 minutes. To remove the residual primers and dNTP, the amplified DNA was purified through microcon YM-10 (Millipore, MA). The procedure followed the manufacturer's recommendation.

**Oligonucleotide array preparation.** The GOLD SEAL micro slides were pretreated in 10%NaOH and 60% ethanol for 1 hour. The slides were rinsed with deionized water thoroughly to remove the residual NaOH. The cleaned slides were then transferred to poly-l-lysine solution (25 ml poly-l-lysine (SIGMA), 25 ml PBS, 200 ml deionized water) for coating. After rinsing once with water, poly-l-lysine coated slides were printed with oligo probes in an Affymetrix GMS-417 arrayer. Four thousand 21-23 base oligonucleotides (obtained from MWG biotech, Inc) corresponding to the last exons of 4000 genes and EST were titrated in 3xSSC buffer in a final concentration of 50 pmol/ $\mu$ l. These probes were printed on poly-l-lysine coated slides in triplicates with

linear pattern by GMS-417 arrayer. Oligonucleotides corresponding to  $\lambda$  phage DNA were used as negative controls, printed at the end of the slides. Cy5, Cy3 or Hex labeled oligo were also printed at the end of the array in order to track the quality of printing and cross linking in the preparation. DNA cross-linking on the slides was carried out by baking the slides at 50°C overnight and an additional 60 mj of UV irradiation in StrataLinker 1800 (STRATAGENE). Unbound probes were washed by 1-methyl-2-pyrrolidinone solution (60 mM sodium borate, 160 mM succinic anhydride, SIGMA) and water.

**Target DNA Hybridization and data analysis.** Fifteen microliters of Cy5 labeled genomic DNA in 1x hybridization buffer were hybridized with the array in a slide hybridization chamber (Fisher biotech) at 45°C overnight in a dark and humid incubator. Post-hybridization wash was carried out by a series of washes, 0.01% SDS in 2XSSC, 1xSSC, and 0.1x SSC. Slides were then scanned with a GMS-428 array scanner (AFFYMETRIX, CA). The scanning resolution was set at 10  $\mu$ m. The auto gain setting determined the signal strength by selecting an appropriate gain setting based on the intensity range of the image. Jaguar 2.0 software (AFFYMETRIX) was used to compute the background signal and background subtraction. The algorithm threshold is determined as 75 percentile of background + 1.5 X IQR background. Each duplicated set of data was obtained in the identical condition. To compare the data from array to array, the normalization was performed by factoring the pixel average intensity of each array to an arbitrary level of 10,000 units. The hybridization signals were analyzed with pair-wise Student T-test.

**Immunohistochemistry staining and tissue micro-array analysis.** Formalin-fixed and paraffin-embedded human liver tissues including HCC, normal liver samples and hepatic tissue samples from livers containing HCC were used. The tissue micro-array contains 484 samples of hepatic tissue, including 319 “benign” (normal liver or tissue adjacent to HCC) liver tissues and 165 HCC. For immunostaining, 4-micron thick sections of tissue array were cut and mounted on glass slides. The sections were heated at 60°C for 12 hours and de-paraffinized in xylene and ethanol. Antigen retrieval was performed using

25 mM sodium citrate buffer (pH9.0) at 90°C for 15 minutes, followed by treatment of 3% H<sub>2</sub>O<sub>2</sub> to block endogenous peroxidase. The slides were incubated at room temperature for 2 hours with anti-GPC3 (BioMosaic, Inc) and anti-TIEG (Abnova, Inc) antibodies at 1:200 and 1:400 dilution, respectively. The sections were then incubated with horseradish peroxidase conjugated anti-mouse IgG for 30 minutes at room temperature. This was followed by incubating the section with 3,3' diaminobenzidine solution (DAKO, Carpinteria, CA) to develop staining color. Hematoxylin was used for counterstaining. The specificity of immunostaining were verified by incubating the similar slides without primary antibody.

1. Yu YP, Landsittel D, Jing L, Nelson J, Ren B, Liu L, McDonald C, et al. Gene expression alterations in prostate cancer predicting tumor aggression and preceding development of malignancy. *J Clin Oncol* 2004;22:2790-2799.
2. Luo JH, Yu YP, Cieply K, Lin F, DeFlavia P, Dhir R, Finkelstein S, et al. Gene expression analysis of prostate cancers. *Mol Carcinog* 2002;33:25-35.
3. Tseng GC, Wong WH. Tight clustering: a resampling-based approach for identifying stable and tight patterns in data. *Biometrics* 2005;61:10-16.
4. Tibshirani R, Hastie T, Narasimhan B, Chu G. Diagnosis of multiple cancer types by shrunken centroids of gene expression. *Proc Natl Acad Sci U S A* 2002;99:6567-6572.
5. Hochberg Y, Benjamini Y. More powerful procedures for multiple significance testing. *Stat Med* 1990;9:811-818.



# **SUPPLEMENTAL TABLES.**

## SUPPLEMENTAL TABLE 1

## GENES INCREASED IN HCC VS. NL

| Gene Name                                                                                                               | Chromosome locus | GenBank # | HCC/NL | HCC/NL p-value <0.0254 |
|-------------------------------------------------------------------------------------------------------------------------|------------------|-----------|--------|------------------------|
| glypican 3                                                                                                              | xq26.1           | U50410    | 19.15  | 0.0000036175           |
| interferon, alpha-inducible protein 27                                                                                  | 14q32            | A1991845  | 6.40   | 0.0000915099           |
| Paternally expressed 10                                                                                                 | 7q21             | AB028974  | 5.25   | 0.0055376577           |
| collagen, type I, alpha 2                                                                                               | 7q22.1           | A1983633  | 4.81   | 0.0088750212           |
| regulator of G-protein signalling 5                                                                                     | 1q23.1           | AA928698  | 4.15   | 0.0000000391           |
| galectin-3 internal gene /// lectin, galactoside-binding, soluble, 3 (galectin 3)                                       | 14q21-q22        | AB006780  | 4.01   | 0.0000000247           |
| SPARC-like 1 (mast9, hevin)                                                                                             | 4q22.1           | X86693    | 3.69   | 0.0000082339           |
| EGF-like repeats and discoidin I-like domains 3 metastasis associated lung adenocarcinoma transcript 1 (non-coding RNA) | 5q14             | AL047586  | 3.51   | 0.0009467139           |
| glutamine synthase                                                                                                      | 11q13.1          | AW007987  | 3.46   | 0.0000002334           |
| lumican                                                                                                                 | 1q31             | X59834    | 3.32   | 0.0001848689           |
| metastasis associated lung adenocarcinoma transcript 1 (non-coding RNA)                                                 | 12q21.3-q22      | U21128    | 3.30   | 0.0001919501           |
| osteopontin                                                                                                             | 11q13.1          | N78139    | 3.29   | 0.0000001593           |
| regulator of G-protein signalling 1                                                                                     | 4q21-q25         | AF052124  | 3.27   | 0.0009783037           |
| ubiquitin D                                                                                                             | 1q31             | S59049    | 2.98   | 0.0039291163           |
| collagen, type IV, alpha 1                                                                                              | 6p21.3           | AL031983  | 2.98   | 0.0001326005           |
| chemokine (C-X-C motif) ligand 10                                                                                       | 13q34            | M11315    | 2.97   | 0.0000053599           |
| multiple C2-domains with two transmembrane regions 1                                                                    | 4q21             | X02530    | 2.96   | 0.0229160849           |
| chemokine (C-C motif) ligand 20                                                                                         | 5q15             | T03872    | 2.88   | 0.0017126823           |
| glutathione S-transferase A2                                                                                            | 2q33-q37         | U64197    | 2.74   | 0.0213926489           |
| interleukin 8                                                                                                           | 6p12.1           | M16594    | 2.69   | 0.0002695450           |
| Kruppel-like factor 5 (intestinal)                                                                                      | 4q13-q21         | M28130    | 2.57   | 0.0005650233           |
| Chondroitin sulfate proteoglycan 2 (versican)                                                                           | 13q22.1          | A1815057  | 2.57   | 0.0000014563           |
| A kinase (PRKA) anchor protein (gravin) 12                                                                              | 5q14.3           | X15998    | 2.56   | 0.0014551462           |
|                                                                                                                         | 6q24-q25         | U81607    | 2.56   | 0.0057094836           |

|                                                              |                     |          |      |              |
|--------------------------------------------------------------|---------------------|----------|------|--------------|
| chemokine (C-X-C motif) ligand 11                            | 4q21.2              | AF030514 | 2.55 | 0.0055464132 |
| mitogen-activated protein kinase 8                           | 10q11.22            | L26318   | 2.54 | 0.0220696723 |
| cytochrome P450, family 3, subfamily A, polypeptide 7        | 7q21-q22.1          | D00408   | 2.53 | 0.0082907407 |
| chemokine (C-C motif) ligand 8                               | 17q11.2             | Y16645   | 2.50 | 0.0221740334 |
| collagen, type III, alpha 1                                  | 2q31                | X06700   | 2.48 | 0.0007899668 |
| chromosome 17 open reading frame 27                          | 17q25.3             | AI655728 | 2.48 | 0.0000089774 |
| cytochrome P450, family 3, subfamily A, polypeptide 7        | 7q21-q22.1          | D00408   | 2.48 | 0.0042930664 |
| aldo-keto reductase family 1, member B10 (aldose reductase)  | 7q33                | U37100   | 2.47 | 0.0005915918 |
| CAP, adenylate cyclase-associated protein, 2 (yeast)         | 6p22.3              | U02390   | 2.47 | 0.0000004375 |
| WW domain binding protein 5                                  | xq22.2              | AI934584 | 2.45 | 0.0003147586 |
| geminin, DNA replication inhibitor                           | 6p22.2              | AI803434 | 2.42 | 0.0029438978 |
| transmembrane 4 superfamily member 3                         | 12q14.1-q21.1       | M35252   | 2.42 | 0.0002025513 |
| hypothetical protein DKFZp434B044                            | 16q24.1             | AI535730 | 2.40 | 0.0000449826 |
| caveolin 1, caveolae protein, 22kDa                          | 7q31.1              | AF070648 | 2.37 | 0.0018321930 |
| nerve growth factor receptor (TNFRSF16) associated protein 1 | xq22.2              | AI879010 | 2.37 | 0.0000842820 |
| chromosome 9 open reading frame 5                            | 9q31                | AI684486 | 2.36 | 0.0009557755 |
| immunoglobulin heavy constant gamma 1 (G1m marker)           | 14q32.33            | AI564488 | 2.36 | 0.0215349518 |
| major histocompatibility complex, class I, F                 | 6p21.3              | X17093   | 2.34 | 0.0001856766 |
| ribosomal protein S6 kinase, 90kDa, polypeptide 3            | xp22.2-p22.1        | AI368015 | 2.32 | 0.0000003430 |
| alpha-fetoprotein                                            | 4q11-q13            | J00077   | 2.31 | 0.0195499222 |
| organic solute transporter alpha                             | 3q29                | AA442232 | 2.31 | 0.0000599900 |
| major histocompatibility complex, class II, DP beta 1        | 6p21.3<br>12q15 /// | M83664   | 2.30 | 0.0000430268 |
| lysozyme                                                     | 19q13.4             | AF009005 | 2.29 | 0.0005193007 |
| UDP glycosyltransferase 2 family, polypeptide B15            | 4q13                | T50788   | 2.28 | 0.0006262232 |
| chromosome 17 open reading frame 27                          | 17q25.3             | AW014019 | 2.28 | 0.0000302026 |
| family with sequence similarity 49, member B                 | 8q24.21             | H24185   | 2.26 | 0.0000741508 |
| immunoglobulin heavy constant gamma 1 (G1m marker)           | 14q32.33            | AI610470 | 2.26 | 0.0000000169 |

|                                                                               |               |          |      |              |
|-------------------------------------------------------------------------------|---------------|----------|------|--------------|
| interferon, alpha-inducible protein (clone IFI-6-16)                          | 1p35          | U22970   | 2.26 | 0.0000043638 |
| chemokine (C-X-C motif) receptor 4                                            | 2q21          | L06797   | 2.25 | 0.0000237304 |
| UDP-glucose ceramide glucosyltransferase                                      | 9q31          | W72338   | 2.24 | 0.0000247090 |
| interleukin 6                                                                 | 7p21          | X04430   | 2.24 | 0.0179114114 |
| vesicle amine transport protein 1 homolog (T californica)                     | 17q21         | AW016496 | 2.22 | 0.0018721846 |
| chromosome 10 open reading frame 10                                           | 10q11.21      | AB022718 | 2.20 | 0.0001772102 |
| glutathione S-transferase                                                     | 6p12.1        | A1199811 | 2.19 | 0.0020480711 |
| tumor protein p53 binding protein, 2                                          | 1q42.1        | U58334   | 2.18 | 0.0000000302 |
| actin, alpha 2, smooth muscle, aorta                                          | 10q23.3       | X13839   | 2.18 | 0.0002984270 |
| hypothetical protein DKFZp762C1112                                            | 8q21.3        | A1422867 | 2.17 | 0.0011136122 |
| transmembrane 4 superfamily member 1                                          | 3q21-q25      | A1445461 | 2.17 | 0.0000313997 |
| glutathione S-transferase A2 /// glutathione S-transferase A1                 | 6p12.1        | M16594   | 2.17 | 0.0076510444 |
| hypothetical protein MGC11324                                                 | 4q21.23       | A1052530 | 2.16 | 0.0000482200 |
| GTP binding protein overexpressed in skeletal muscle                          | 8q13-q21      | U10550   | 2.15 | 0.0000002304 |
| chemokine (C-C motif) ligand 2                                                | 17q11.2-q21.1 | M26683   | 2.15 | 0.0173077999 |
| cell division cycle 2, G1 to S and G2 to M                                    | 10q21.1       | Y00272   | 2.15 | 0.0008701684 |
| thrombospondin 2                                                              | 6q27          | L12350   | 2.14 | 0.0002967788 |
| armadillo repeat containing 1                                                 | 8q13.1        | AL110454 | 2.13 | 0.0001765297 |
| cadherin 11, type 2, OB-cadherin (osteoblast)                                 | 16q22.1       | D21255   | 2.13 | 0.0004255250 |
| cyclic AMP phosphoprotein, 19 kD                                              | 15q21.2       | A1525176 | 2.13 | 0.0000000108 |
| regulator of G-protein signalling 2, 24kDa                                    | 1q31          | L13463   | 2.12 | 0.0021340953 |
| regulator of G-protein signalling 5                                           | 1q23.1        | AB008109 | 2.11 | 0.0000002747 |
| immunoglobulin heavy constant gamma 1 (G1m marker)                            | 14q32.33      | M80899   | 2.11 | 0.0000000502 |
| meningioma expressed antigen 5 (hyaluronidase)                                | 10q24.1-q24.3 | A1344277 | 2.10 | 0.0000027740 |
| collagen, type V, alpha 2                                                     | 2q14-q32      | Y14690   | 2.10 | 0.0000048801 |
| dUTP pyrophosphatase                                                          | 15q15-q21.1   | U31930   | 2.09 | 0.0000719365 |
| CAP, adenylate cyclase-associated protein, 2 (yeast)                          | 6p22.3        | N90755   | 2.08 | 0.0000115830 |
| solute carrier family 1 (glial high affinity glutamate transporter), member 2 | 11p13-p12     | AW005111 | 2.08 | 0.0034482303 |
| vimentin                                                                      | 10p13         | M14144   | 2.08 | 0.0000134092 |

|                                                                                                     |             |          |      |                         |
|-----------------------------------------------------------------------------------------------------|-------------|----------|------|-------------------------|
| high-mobility group box 1                                                                           | 13q12       | AI690476 | 2.07 | 0.0000014822            |
| osteonectin                                                                                         | 5q31.3-q32  | J03040   | 2.07 | 0.0194326532            |
| dipeptidylpeptidase 4 (CD26, adenosine deaminase complexing protein 2)                              | 2q24.3      | X60708   | 2.07 | 0.0000808056            |
| ectonucleotide pyrophosphatase/phosphodiesterase 2 (autotaxin)                                      | 8q24.1      | L35594   | 2.07 | 0.0001084712            |
| tight junction protein 2 (zona occludens 2)                                                         | 9q13-q21    | AA161241 | 2.06 | 0.0136573064            |
| Interferon regulatory factor 2 binding protein 2                                                    | 1q42.3      | AI819847 | 2.06 | 0.0000027116            |
| eukaryotic translation elongation factor 1 alpha 2                                                  | 20q13.3     | L10340   | 2.06 | 0.0075766269            |
| eukaryotic translation initiation factor 3, subunit 6 48kDa                                         | 8q22-q23    | AW015717 | 2.05 | 0.0000528209            |
| zinc finger motif enhancer binding protein 2                                                        | 1p22.2      | AA159179 | 2.04 | 0.0000432515            |
| Microtubule-associated protein 2                                                                    | 2q34-q35    | AA167714 | 2.04 | 0.0000232673            |
| translocase of outer mitochondrial membrane 20 homolog (yeast)                                      | 1q42        | D13641   | 2.04 | 0.0000002807            |
| UDP-N-acetyl-alpha-D-galactosamine:polypeptide N-acetylgalactosaminyltransferase 11 (GalNAc-T11)    | 7q34-q36    | AI985274 | 2.04 | 0.0000090862            |
| arrestin domain containing 3                                                                        | 5q14.3      | AA587245 | 2.03 | 0.0000057152            |
| brother of CDO                                                                                      | 3q13.2      | AA628405 | 2.03 | 0.0000042158            |
| WD repeat domain 26                                                                                 | 1q42.12     | AL042428 | 2.03 | 0.0000000269            |
| Zinc finger protein 281                                                                             | 1q32.1      | AA121673 | 2.03 | 0.0000008892            |
| NAD(P)H dehydrogenase, quinone 1                                                                    | 16q22.1     | M81600   | 2.02 | 0.0024662151            |
| KIAA0888 protein                                                                                    | 5q13.3      | AB020695 | 2.02 | 0.0005463522            |
| Homo sapiens, clone IMAGE:4096273, mRNA interferon-induced protein with tetratricopeptide repeats 1 | ---         | AI887641 | 2.02 | 0.0000124322            |
| SRY (sex determining region Y)-box 4                                                                | 10q25-q26   | M24594   | 2.02 | 0.0000239752            |
| tumor necrosis factor receptor superfamily, member 21                                               | 6p22.3      | AI535884 | 2.01 | 0.0000007228            |
| CK2 interacting protein 1; HQ0024c protein                                                          | 6p21.1-12.2 | AI807277 | 2.00 | 0.0003400044            |
|                                                                                                     | 1q21.2      | AA524401 | 2.00 | 0.0000013204            |
| <b>OTHER GENES OF BIOLOGIC SIGNIFICANCE (0.045&gt;P-VALUE&gt;0.0254)</b>                            |             |          |      | <b>P-VALUE&lt;0.045</b> |
| pancreatitis-associated protein                                                                     | 2p12        | L15533   | 5.91 | 0.0340178611            |
| cholesterol 7-alpha hydroxylase (CYP7)                                                              | 8q11-q12    | M93133   | 3.34 | 0.0315047386            |

|                                   |               |          |      |              |
|-----------------------------------|---------------|----------|------|--------------|
| lactate dehydrogenase B           | 12p12.2-p12.1 | T03298   | 2.94 | 0.0377702426 |
| hypothetical protein DKFZp434L142 | 4q32.1        | AI913548 | 2.49 | 0.0441194645 |
| carboxypeptidase E                | 4q32.3        | X51405   | 2.49 | 0.0419248491 |
| angiopoietin-like 1               | 1q25.2        | AA621478 | 2.12 | 0.0436001729 |

## SUPPLEMENTAL TABLE 2

## GENES UNDEREXPRESSED IN HCC VS. NL

| Gene Name                                                          | Chromosome locus | GenBank # | HCC/NL | HCC/NL p-value <0.0254 |
|--------------------------------------------------------------------|------------------|-----------|--------|------------------------|
| serum amyloid A1                                                   | 11p15.1          | AA829286  | 0.12   | 0.0000000000000000     |
| hypothetical protein dJ462O23.2                                    | 1p36.12-p35.1    | U90918    | 0.12   | 0.0000000000000053     |
| myosin XVB, pseudogene                                             | 17q25.1          | AI671062  | 0.14   | 0.000000001933547      |
| chemokine (C-C motif) ligand 7                                     | 17q11.2-q12      | X72308    | 0.20   | 0.000000000005214      |
| ficolin (collagen/fibrinogen domain containing) 3 (Hakata antigen) | 1p36.11          | D88587    | 0.20   | 0.000000000427027      |
| hypothetical protein LOC286440                                     | xq22.3           | AL034399  | 0.20   | 0.000000000095405      |
| hepcidin antimicrobial peptide                                     | 19q13.1          | AI937227  | 0.22   | 0.000000002731361      |
| hypothetical protein MGC3130                                       | 17q21.31         | AI003902  | 0.22   | 0.0000000000000006     |
| motile sperm domain containing 2                                   | xp22.2           | AI744083  | 0.24   | 0.000000000199388      |
| C-reactive protein, pentraxin-related                              | 1q21-q23         | X56692    | 0.24   | 0.0000000000000021     |
| hypothetical protein FLJ14490                                      | 1p34.2           | AI968937  | 0.25   | 0.000000110444537      |
| hypothetical protein FLJ35036                                      | 3q23             | AI928164  | 0.29   | 0.0000000000000349     |
| metallothionein 1G                                                 | 16q13            | J03910    | 0.30   | 0.000173664228547      |
| complement component 9                                             | 5p14-p12         | K02766    | 0.30   | 0.000000001958046      |
| serum amyloid A4, constitutive                                     | 11p15.1-p14      | M81349    | 0.31   | 0.000000000016444      |
| leucine-rich alpha-2-glycoprotein 1                                | 19p13.3          | T61106    | 0.31   | 0.000000000041315      |
| survival of motor neuron protein interacting protein 1             | 14q13            | AF027150  | 0.32   | 0.0000000000000009     |
| phospholipase A2, group IIA (platelets, synovial fluid)            | 1p35             | M22430    | 0.32   | 0.000045262446502      |
| orosomucoid 1                                                      | 9q31-q32         | X02544    | 0.32   | 0.0000000000000000     |
| ankyrin repeat and BTB (POZ) domain containing 1                   | 3q21             | AI823581  | 0.32   | 0.0000000000000153     |
| small proline-rich protein 2B                                      | 1q21-q22         | M21302    | 0.32   | 0.0000000000000007     |
| hypothetical protein LOC284412                                     | 19q13.13         | AA454184  | 0.33   | 0.0000000000000006     |

|                                                                           |               |           |      |                   |
|---------------------------------------------------------------------------|---------------|-----------|------|-------------------|
| alpha-1 antitrypsin, member 3                                             | 14q32.1       | X68733    | 0.33 | 0.000000000000003 |
| activating transcription factor 5                                         | 19q13.3       | AB021663  | 0.33 | 0.000000000235743 |
| GalNAc-T2                                                                 | 1q41-q42      | NM_004481 | 0.33 | 0.000000658717489 |
| complement component 1, r subcomponent-like                               | 12p13.31      | N91560    | 0.33 | 0.000000001166802 |
| angiopoietin-like 2                                                       | 9q34          | AW006802  | 0.34 | 0.000000000000033 |
| lipopolysaccharide binding protein                                        | 20q11.23-q12  | AF013512  | 0.34 | 0.000000000278815 |
| peroxiredoxin 4                                                           | xp22.11       | U25182    | 0.34 | 0.000000000012940 |
| Acetyl-Coenzyme A acetyltransferase 1 (acetoacetyl Coenzyme A thiolase)   | 11q22.3-q23.1 | D10511    | 0.34 | 0.000000001361116 |
| proline-rich protein BstNI subfamily 1                                    | 12p13.2       | S80905    | 0.35 | 0.000000000001179 |
| cyclin-dependent kinase inhibitor 2B (p15, inhibits CDK4)                 | 9p21          | L36844    | 0.36 | 0.000000003535510 |
| apolipoprotein F                                                          | 12q13.3       | L27050    | 0.36 | 0.000028589546313 |
| calneuron 1                                                               | 7q11          | R40920    | 0.36 | 0.000000119852557 |
| fibrinogen, gamma polypeptide                                             | 4q28          | AI568934  | 0.36 | 0.000000000001409 |
| Phosphodiesterase 8B                                                      | 5q13.3        | N49949    | 0.36 | 0.000000057117872 |
| fibrinogen-like 1                                                         | 8p22-p21.3    | D14446    | 0.38 | 0.000000000001485 |
| Transmembrane 6 superfamily member 1                                      | 15q24-q26     | AA411025  | 0.38 | 0.000000000006004 |
| chromodomain helicase DNA binding protein 1-like                          | 1q12          | AI422099  | 0.39 | 0.000000000780052 |
| tubby like protein 1                                                      | 6p21.3        | U82468    | 0.39 | 0.000000000000733 |
| hypothetical protein FLJ14490                                             | 1p34.2        | AL042399  | 0.39 | 0.000000003979694 |
| serine protease inhibitor, Kazal type 1                                   | 5q32          | AI961220  | 0.39 | 0.000984458555811 |
| hypothetical protein FLJ21439                                             | 15q14         | AA780049  | 0.39 | 0.000000000141688 |
| solute carrier family 13 (sodium-dependent citrate transporter), member 5 | 17p13.1       | U92029    | 0.39 | 0.000009558174031 |
| LIM domain binding 3                                                      | 10q22.3-q23.2 | AJ133766  | 0.39 | 0.000000000000000 |
| metallothionein 1B (functional)                                           | 16q13         | M13485    | 0.40 | 0.000000002529257 |
| Hypothetical protein MGC35361                                             | 7q22.1        | W25633    | 0.41 | 0.000000000021584 |
| metallothionein 1A (functional)                                           | 16q13         | K01383    | 0.41 | 0.000000003858776 |
| hypothetical protein FLJ21945                                             | 2p23.3        | AI637685  | 0.41 | 0.000000000000114 |



|                                                                                          |               |          |      |                   |
|------------------------------------------------------------------------------------------|---------------|----------|------|-------------------|
| coagulation factor IX (plasma thromboplastic component, Christmas disease, hemophilia B) | xq27.1-q27.2  | K02402   | 0.41 | 0.000000023122134 |
| metallothionein 1H                                                                       | 16q13         | R93527   | 0.41 | 0.000000000010371 |
| solute carrier family 39 (zinc transporter), member 14                                   | 8p21.3        | D31887   | 0.42 | 0.000000000021736 |
| serine hydroxymethyltransferase 1 (soluble)                                              | 17p11.2       | L11931   | 0.42 | 0.000000000403428 |
| metallothionein 1E (functional)                                                          | 16q13         | M10942   | 0.42 | 0.000000026305271 |
| hemopexin                                                                                | 11p15.5-p15.4 | M36803   | 0.42 | 0.000000000000228 |
| hypothetical protein FLJ30990                                                            | 2q31.2        | AI753091 | 0.42 | 0.000000000000000 |
| fibrinogen, A alpha polypeptide                                                          | 4q28          | M64982   | 0.42 | 0.000000000000001 |
| protein phosphatase 2 (formerly 2A), regulatory subunit A (PR 65)                        | 11q23.2       | AW009884 | 0.42 | 0.000059593721753 |
| autocrine motility factor receptor                                                       | 16q21         | M63175   | 0.42 | 0.000000041007995 |
| metallothionein 1X                                                                       | 16q13         | AA224832 | 0.43 | 0.000004119579961 |
| Carboxypeptidase N, polypeptide 2, 83kD                                                  | 8p23-p22      | J05158   | 0.43 | 0.000000209552876 |
| RAS, dexamethasone-induced 1                                                             | 17p11.2       | AI968384 | 0.43 | 0.000129436187925 |
| Male sterility domain containing 1                                                       | 12p11.22      | H16791   | 0.43 | 0.000005557969861 |
| haptoglobin                                                                              | 16q22.1       | X00442   | 0.43 | 0.000000000000000 |
| protocadherin 8                                                                          | 13q14.3-q21.1 | AF061573 | 0.43 | 0.000118170471666 |
| chromosome 18 open reading frame 10                                                      | 18q12.2       | AA143321 | 0.43 | 0.000000000672585 |
| Cell division cycle and apoptosis regulator 1                                            | 10q21.3       | W73136   | 0.43 | 0.000000000000822 |
| ferrochelatase (protoporphyrin)                                                          | 18q21.3       | D00726   | 0.43 | 0.000000000110240 |
| STAT3                                                                                    | 17q21.31      | AA057753 | 0.44 | 0.000000047075189 |
| Hermansky-Pudlak syndrome 3                                                              | 3q24          | AA219354 | 0.44 | 0.000000013449438 |
| transcriptional regulating factor 1                                                      | 6p21.1-p12.1  | AW006022 | 0.44 | 0.000000000000149 |
| metallothionein 1F (functional)                                                          | 16q13         | H68340   | 0.44 | 0.000000000073106 |
| protein kinase C, epsilon                                                                | 2p21          | AA039557 | 0.44 | 0.000419388468108 |
| UDP glycosyltransferase 2 family, polypeptide B15                                        | 4q13          | U08854   | 0.44 | 0.000000000280543 |
| kelch-like 5 (Drosophila)                                                                | 4p14          | AA806103 | 0.45 | 0.000122943416737 |
| brain protein 44-like                                                                    | 6q27          | AI749098 | 0.45 | 0.000000004326065 |

|                                                               |               |          |      |                   |
|---------------------------------------------------------------|---------------|----------|------|-------------------|
| Hermansky-Pudlak syndrome 5                                   | 11p14         | AB023234 | 0.45 | 0.000009255623340 |
| IQ motif containing F3                                        | 3p21.2        | AA398133 | 0.45 | 0.000000063715203 |
| complement factor H-related 4                                 | 1q32          | X98337   | 0.46 | 0.002269653901947 |
| corticotropin releasing hormone binding protein               | 5q11.2-q13.3  | X58022   | 0.46 | 0.000001135915625 |
| ceruloplasmin (ferroxidase)                                   | 3q23-q25      | M13699   | 0.46 | 0.000000000276892 |
| alanine-glyoxylate aminotransferase 2                         | 5p13          | N65959   | 0.46 | 0.000021687906929 |
| phosphoinositide-3-kinase adaptor protein 1                   | 10q24.1       | AI762879 | 0.46 | 0.000076156952664 |
| regulator of G-protein signalling like 1                      | 1q25          | AA757244 | 0.47 | 0.000000364908218 |
| Potassium voltage-gated channel, KQT-like subfamily, member 1 | 11p15         | AA029517 | 0.47 | 0.000000000037555 |
| hypothetical protein FLJ12484                                 | 15q26.1       | AI039246 | 0.47 | 0.000000000140227 |
| hypothetical protein FLJ32452                                 | 12q13.3       | T92427   | 0.47 | 0.000000000000080 |
| lactate dehydrogenase A                                       | 11p15.4       | X02152   | 0.47 | 0.000000019952819 |
| chromosome 10 open reading frame 104                          | 10q22.1       | AA034078 | 0.48 | 0.000000002091168 |
| complement factor H-related 3                                 | 1q32          | X68679   | 0.48 | 0.002358214732103 |
| IQ motif and Sec7 domain 1                                    | 3p25.2        | AB018306 | 0.48 | 0.000000000023987 |
| metallothionein 3 (growth inhibitory factor (neurotrophic))   | 16q13         | M93311   | 0.48 | 0.000000000432174 |
| Syntaxin 17                                                   | 9q31.1        | AA600810 | 0.48 | 0.000000724345388 |
| phosphodiesterase 3B, cGMP-inhibited                          | 11p15.1       | AI651372 | 0.48 | 0.000000000166674 |
| hydroxyacid oxidase (glycolate oxidase) 1                     | 20p12         | AB024079 | 0.48 | 0.000000000018111 |
| thioredoxin domain containing 7 (protein disulfide isomerase) | 2p25.1        | D49489   | 0.49 | 0.000000000002609 |
| aquaporin 3                                                   | 9p13          | N74607   | 0.49 | 0.000000001494900 |
| tumor rejection antigen (gp96) 1                              | 12q24.2-q24.3 | X15187   | 0.49 | 0.000000779827620 |
| insulin-like growth factor 1 (IGF1)                           | 12q22-q23     | X57025   | 0.49 | 0.000015035416112 |
| complement component 4 binding protein, beta                  | 1q32          | L11245   | 0.49 | 0.000000000519597 |
| nicotinamide N-methyltransferase                              | 11q23.1       | U08021   | 0.49 | 0.000000004839254 |
| heat shock 70kDa protein 6 (HSP70B')                          | 1q23          | X51757   | 0.49 | 0.000000000002860 |
| solute carrier family 17 (sodium phosphate), member 2         | 6p21.3        | U90544   | 0.49 | 0.000000542372879 |

|                                                                   |                 |          |      |                   |
|-------------------------------------------------------------------|-----------------|----------|------|-------------------|
| hypothetical protein FLJ11712                                     | 13q14.3         | AA181196 | 0.49 | 0.000000001581265 |
| cytochrome P450, family 19, subfamily A, polypeptide 1            | 15q21.1         | X13589   | 0.49 | 0.000000000108822 |
| Prickle-like 2 (Drosophila)                                       | 3p14.1          | AA412673 | 0.49 | 0.000000000006880 |
| testis-specific kinase substrate                                  | 19q13.3         | AL041339 | 0.49 | 0.000000000000000 |
| surfeit 4                                                         | 9q34.2          | R26138   | 0.49 | 0.000002001823259 |
| proline synthetase co-transcribed homolog (bacterial)             | 8p11.2          | AB018566 | 0.49 | 0.000000000003264 |
| phosphoserine aminotransferase 1                                  | 9q21.2          | AI971498 | 0.49 | 0.000000085739025 |
| ocular development-associated gene                                | 7q21-q22        | AI337901 | 0.50 | 0.000000000000004 |
| TRIAD3 protein                                                    | 7p22.1          | W27535   | 0.50 | 0.000000000049396 |
| alpha-2-glycoprotein 1, zinc                                      | 7q22.1          | X59766   | 0.50 | 0.000000089786283 |
| tankyrase, TRF1-interacting ankyrin-related ADP-ribose polymerase | 8p23.1          | AF082558 | 0.50 | 0.000000003727625 |
| putative lymphocyte G0/G1 switch gene                             | 1q32.2-q41      | M69199   | 0.50 | 0.000352700769927 |
| fibrinogen, gamma polypeptide                                     | 4q28            | AI989422 | 0.50 | 0.000000000000000 |
| stress-associated endoplasmic reticulum protein 1                 | 3q25.1          | AA887132 | 0.50 | 0.000006354912141 |
| erythropoietin receptor                                           | 19p13.3-p13.2   | X97671   | 0.51 | 0.000000000061953 |
| hypothetical protein LOC253842                                    | 9q34.11         | AA176289 | 0.51 | 0.000000010132654 |
| gamma-glutamyltransferase-like activity 1                         | 22q11.23        | M64099   | 0.51 | 0.000000000000000 |
| paired immunoglobulin-like type 2 receptor beta                   | 7q22.1          | AI954159 | 0.51 | 0.000000000008891 |
| chromosome 20 open reading frame 3                                | 20p11.22-p11.21 | AI032386 | 0.51 | 0.000000026777403 |
| type I transmembrane C-type lectin receptor DCL-1                 | 2q24.2          | D14664   | 0.51 | 0.000001933894422 |
| isocitrate dehydrogenase 2 (NADP+), mitochondrial                 | 15q26.1         | X69433   | 0.51 | 0.000000003515240 |
| solute carrier family 27 (fatty acid transporter), member 2       | 15q21.2         | D88308   | 0.51 | 0.000003386440407 |
| cell cycle progression 1                                          | 15q21.1         | AI770067 | 0.51 | 0.000000071468934 |
| solute carrier family 1, member 1                                 | 9p24            | AI928365 | 0.51 | 0.000086704663365 |
| superoxide dismutase 2, mitochondrial                             | 6q25.3          | X07834   | 0.51 | 0.000034071165644 |
| glutaredoxin (thioltransferase)                                   | 5q14            | X76648   | 0.51 | 0.000000246860457 |

### SUPPLEMENTAL TABLE 3

### GENES OVER-EXPRESSED IN HCC VS. AT

| <b>Gene Name</b>                                                         | <b>Chromosome locus</b> | <b>Unigene #</b> | <b>HCC/AT</b> | <b>HCC/AT P-value&lt;0.00473</b> |
|--------------------------------------------------------------------------|-------------------------|------------------|---------------|----------------------------------|
| glypican 3                                                               | xq26.1                  | U50410           | 5.88          | 0.0000362681                     |
| collagen, type I, alpha 2                                                | 7q22.1                  | AI610692         | 3.39          | 0.0003167752                     |
| serine protease inhibitor, Kazal type 1                                  | 5q32                    | AI961220         | 2.32          | 0.0024584918                     |
| heat shock 27kDa protein 1                                               | 7q11.23                 | AI635057         | 2.20          | 0.0003581711                     |
| spondin 2, extracellular matrix protein                                  | 4p16.3                  | AW007426         | 2.11          | 0.0000379429                     |
| chromobox homolog 4 (Pc class homolog, Drosophila)                       | 17q25.3                 | AI570531         | 2.03          | 0.0026225816                     |
| <b>OTHER GENES OF BIOLOGIC SIGNIFICANCE (0.05&gt;P-VALUE&gt;0.00473)</b> |                         |                  |               | <b>HCC/AT P-value&lt;0.04</b>    |
| Paternally expressed 10                                                  | 7q21                    | AB028974         | 4.33          | 0.0082611345                     |
| EDIL-3 (EGF-like repeats and discoidin I-like domains 3)                 | 5q14                    | AL047586         | 2.35          | 0.0070002213                     |
| multiple C2-domains with two transmembrane regions 1                     | 5q15                    | T03872           | 2.27          | 0.0066686433                     |
| osteopontin                                                              | 4q21-q25                | AF052124         | 2.14          | 0.0141018017                     |
| osteonectin                                                              | 5q31.3-q32              | J03040           | 2.04          | 0.0216456200                     |
| alpha-fetoprotein                                                        | 4q11-q13                | J00077           | 2.00          | 0.0385721372                     |

## SUPPLEMENTAL TABLE 4

## GENES DECREASED IN HCC VS. ADJACENT TISSUE

| Gene name                                                                                 | Chromosome<br>locus | GenBank # | HCC/AT | HCC/AT P-<br>value<0.00473 |
|-------------------------------------------------------------------------------------------|---------------------|-----------|--------|----------------------------|
| hypothetical protein MGC27165                                                             | 14q32.33            | S71043    | 0.33   | 0.0008780901               |
| metallothionein 1G                                                                        | 16q13               | J03910    | 0.37   | 0.0004223274               |
| serum amyloid A1                                                                          | 11p15.1             | AA829286  | 0.38   | 0.0017176571               |
| immunoglobulin heavy constant gamma 1 (G1m marker)                                        | 14q32.33            | AJ001564  | 0.39   | 0.0043959232               |
| ficolin (collagen/fibrinogen domain containing) 3 (Hakata antigen)                        | 1p36.11             | Hs.333383 | 0.40   | 0.0000272951               |
| metallothionein 1X                                                                        | 16q13               | AA224832  | 0.40   | 0.0000118953               |
| immunoglobulin lambda constant 2 (Kern-Oz- marker)                                        | 22q11.2             | J03011    | 0.40   | 0.0027603778               |
| immunoglobulin kappa constant                                                             | 2p12                | M63438    | 0.41   | 0.0006603977               |
| Immunoglobulin J polypeptide, linker protein for immunoglobulin alpha and mu polypeptides | 4q21                | AI660656  | 0.41   | 0.0010205442               |
| immunoglobulin lambda constant 2 (Kern-Oz- marker)                                        | 22q11.2             | X79783    | 0.42   | 0.0034711767               |
| hypothetical protein dJ462O23.2                                                           | 1p36.12-p35.1       | U90918    | 0.43   | 0.0042217231               |
| butyrylcholinesterase                                                                     | 3q26.1-q26.2        | M16541    | 0.44   | 0.0013549129               |
| chemokine (C-X-C motif) ligand 6 (granulocyte chemotactic protein 2)                      | 4q21                | U81234    | 0.45   | 0.0018071612               |
| aldo-keto reductase family 1, member D1 (delta 4-3-ketosteroid-5-beta-reductase)          | 7q32-q33            | Z28339    | 0.46   | 0.0008431942               |
| cytochrome P450, family 2, subfamily A, polypeptide 6                                     | 19q13.2             | X13930    | 0.48   | 0.0004069825               |
| hemoglobin, beta                                                                          | 11p15.5             | M25079    | 0.48   | 0.0006770709               |
| butyrobetaine (gamma), 2-oxoglutarate dioxygenase (gamma-butyrobetaine hydroxylase) 1     | 11p14.2             | AF082868  | 0.48   | 0.0008914462               |
| interleukin 1 receptor accessory protein                                                  | 3q28                | AI189680  | 0.48   | 0.0005000738               |
| solute carrier family 22 (organic cation transporter), member 1                           | 6q26                | X98332    | 0.48   | 0.0000043178               |
| metallothionein 1B                                                                        | 16q13               | M13485    | 0.49   | 0.0000019231               |
| metallothionein 1E                                                                        | 16q13               | M10942    | 0.49   | 0.0000070106               |

|                                                                          |              |          |      |              |
|--------------------------------------------------------------------------|--------------|----------|------|--------------|
| metallothionein 1A                                                       | 16q13        | K01383   | 0.49 | 0.0000044712 |
| apolipoprotein F                                                         | 12q13.3      | L27050   | 0.49 | 0.0000293196 |
| serum amyloid A4, constitutive                                           | 11p15.1-p14  | M81349   | 0.50 | 0.0000009402 |
| fructose-1,6-bisphosphatase 1                                            | 9q22.3       | U21931   | 0.51 | 0.0000076049 |
| tryptophan 2,3-dioxygenase                                               | 4q31-q32     | U32989   | 0.52 | 0.0000242939 |
| metallothionein 1H                                                       | 16q13        | R93527   | 0.52 | 0.0000016996 |
| carbonic anhydrase II                                                    | 8q22         | J03037   | 0.54 | 0.0000042713 |
| afamin                                                                   | 4q11-q13     | L32140   | 0.54 | 0.0000649205 |
| chemokine (C-X-C motif) ligand 12 (stromal cell-derived factor 1)        | 10q11.1      | U19495   | 0.54 | 0.0000706483 |
| complement component 9                                                   | 5p14-p12     | K02766   | 0.55 | 0.0010604775 |
| GADD45G                                                                  | 9q22.1-q22.2 | AI952982 | 0.55 | 0.0005290806 |
| pre-B-cell colony enhancing factor 1                                     | 7q22.3       | U02020   | 0.55 | 0.0022326511 |
| putative lymphocyte G0/G1 switch gene                                    | 1q32.2-q41   | M69199   | 0.55 | 0.0017120131 |
| alpha-2-glycoprotein 1, zinc                                             | 7q22.1       | X59766   | 0.55 | 0.0000002134 |
| orosomucoid 1                                                            | 9q31-q32     | X02544   | 0.55 | 0.0000000547 |
| tumor necrosis factor receptor superfamily, member 11b (osteoprotegerin) | 8q24         | AB008822 | 0.56 | 0.0034819907 |
| hypothetical protein MGC3130                                             | 17q21.31     | AI003902 | 0.56 | 0.0017847883 |
| nicotinamide N-methyltransferase                                         | 11q23.1      | U08021   | 0.56 | 0.0000254343 |
| growth hormone receptor                                                  | 5p13-p12     | X06562   | 0.56 | 0.0010974508 |
| metallothionein 1F (functional)                                          | 16q13        | M10943   | 0.56 | 0.0000071957 |
| mannose-binding lectin (protein C) 2, soluble (opsonic defect)           | 10q11.2-q21  | X15422   | 0.56 | 0.0001612084 |
| cytochrome P450, family 1, subfamily A, polypeptide 2                    | 15q22-qter   | M31667   | 0.56 | 0.0016336504 |
| insulin-like growth factor binding protein 3                             | 7p13-p12     | M35878   | 0.57 | 0.0000138101 |

**OTHER GENES OF BIOLOGIC SIGNIFICANCE (0.03>P-VALUE>0.00473)**

|                                                                                   |          |          |      | <b>HCC/AT P-value&lt;0.03</b> |
|-----------------------------------------------------------------------------------|----------|----------|------|-------------------------------|
| immunoglobulin heavy locus /// immunoglobulin heavy constant gamma 1 (G1m marker) | 14q32.33 | AI828404 | 0.39 | 0.0362948126                  |
| interleukin 8                                                                     | 4q13-q21 | M28130   | 0.40 | 0.0077674876                  |
| immunoglobulin heavy constant gamma 1 (G1m marker)                                | 14q32.33 | AI564488 | 0.43 | 0.0173043713                  |

|                                                                                      |             |          |      |              |
|--------------------------------------------------------------------------------------|-------------|----------|------|--------------|
| immunoglobulin lambda constant 2 (Kern-Oz- marker)                                   | 22q11.2     | AI872510 | 0.43 | 0.0276011471 |
| myosin XVB, pseudogene                                                               | 17q25.1     | AI671062 | 0.45 | 0.0166134427 |
| similar to bK246H3.1 (immunoglobulin lambda-like polypeptide 1, pre-B-cell specific) | 22q11.23    | AI932613 | 0.50 | 0.0061802509 |
| chemokine (C-C motif) ligand 7                                                       | 17q11.2-q12 | X72308   | 0.51 | 0.0148936989 |
| hepcidin antimicrobial peptide                                                       | 19q13.1     | AI937227 | 0.53 | 0.0156796619 |
| PAI1                                                                                 | 7q21.3-q22  | M14083   | 0.54 | 0.0177070194 |
| complement factor H-related 4                                                        | 1q32        | X98337   | 0.56 | 0.0157961419 |

## SUPPLEMENTAL TABLE 5

### Gene Name

mitogen-inducible gene 6  
 immediate early response 3 interacting protein 1  
 FLJ21963 protein  
 Pyrophosphatase (inorganic) 1 (PP)  
 PTPN13: Protein tyrosine phosphatase, non-receptor type 13  
 MALAT1: Metastasis associated lung adenocarcinoma transcript 1  
 hypothetical protein FLJ30596  
 transforming growth factor, beta 1  
 zinc finger protein 204  
 CLTC: Clathrin, heavy polypeptide (Hc)  
 ELL2: Elongation factor, RNA polymerase II, adipose differentiation-related protein  
 ASXL2: Additional sex combs like 2 (Drosophila)  
 insulin-like growth factor binding protein 1  
 ATP-binding cassette, sub-family A (ABC1), member 1  
 Similar to golgin-67 isoform  
 tetratricopeptide repeat domain 16  
 LOC399491 protein  
 cytochrome P450, family 3, subfamily A, polypeptide 4  
 cytochrome P450, family 2, subfamily E, polypeptide 1  
 integral membrane protein 2B  
 elongation factor, RNA polymerase II, 2  
 NFE2L2: Nuclear factor (erythroid-derived 2)-like 2  
 leukocyte cell-derived chemotaxin 2  
 KLF6: Kruppel-like factor 6  
 G antigen, family D, 3  
 BAX inhibitor 1

## GENES INCREASED IN HPBL VS. HCC

| Chromosome locus | GenBank # | HPBL/HCC | HPBL/HCC P value <0.01069 |
|------------------|-----------|----------|---------------------------|
| 1p36.12-36.33    | AI571452  | 3.88     | 0.0004427442              |
| 18q12            | AI755071  | 3.40     | 0.0006995293              |
| 12q21.31         | AI123815  | 3.18     | 0.0073770191              |
| ---              | AA592983  | 2.94     | 0.0001680994              |
| ---              | AI820966  | 2.83     | 0.0054976986              |
| ---              | AI935353  | 2.81     | 0.0001036320              |
| 5p13.2           | AI962601  | 2.64     | 0.0000249897              |
| 19q13.1          | X02812    | 2.58     | 0.0000990358              |
| 6p21.3           | AF033199  | 2.58     | 0.0082274144              |
| ---              | W90250    | 2.55     | 0.0086559249              |
| ---              | H60379    | 2.47     | 0.0000203235              |
| 9p22.1           | X97324    | 2.45     | 0.0087383662              |
| ---              | AA774820  | 2.44     | 0.0000037098              |
| 7p13-p12         | M74587    | 2.44     | 0.0000694010              |
| 9q31.1           | AL048433  | 2.42     | 0.0057252055              |
| ---              | AA281618  | 2.42     | 0.0047901900              |
| 9q34.11          | R26574    | 2.37     | 0.0000000175              |
| 16p13.1          | AI984573  | 2.34     | 0.0044804702              |
| 7q21.1           | D00003    | 2.25     | 0.0104921808              |
| 10q24.3-qter     | J02625    | 2.25     | 0.0012746009              |
| 13q14.3          | AI499172  | 2.23     | 0.0022903305              |
| 5q15             | C75510    | 2.17     | 0.0000007238              |
| ---              | AW023229  | 2.15     | 0.0046690831              |
| 5q31.1-q32       | D63521    | 2.12     | 0.0048468010              |
| ---              | AI887641  | 2.11     | 0.0052141206              |
| xp11.22-p11.21   | R33105    | 2.11     | 0.0039857902              |
| ---              | C06024    | 2.11     | 0.0012581437              |



|                                                                   |         |          |      |              |
|-------------------------------------------------------------------|---------|----------|------|--------------|
| ATPase, Ca <sup>++</sup> transporting, plasma membrane 1          | 12q21.3 | AI337321 | 2.10 | 0.0043151043 |
| phospholipid scramblase 4                                         | 3q24    | AW021496 | 2.09 | 0.0073092203 |
| DNA polymerase-transactivated protein 6                           | 2q33.1  | AL040007 | 2.06 | 0.0039865566 |
| ATPase family, AAA domain containing 2                            | 8q24.13 | AI139629 | 2.06 | 0.0000481250 |
| ZBTB1: Zinc finger and BTB domain containing 1                    | ---     | AA001367 | 2.06 | 0.0001583248 |
| formin binding protein 1                                          | 9q34    | AA828277 | 2.05 | 0.0084224591 |
| inter-alpha (globulin) inhibitor H2                               | 10p15   | X07173   | 2.04 | 0.0002306217 |
| hypothetical protein LOC339047                                    | 16p12.3 | AI954084 | 2.02 | 0.0058510966 |
| SNRPN: Small nuclear ribonucleoprotein polypeptide N              | ---     | AI149693 | 2.01 | 0.0006638551 |
| chemokine (C-X-C motif) ligand 12 (stromal cell-derived factor 1) | 10q11.1 | U19495   | 2.01 | 0.0070566924 |
| FN1: Fibronectin 1                                                | ---     | AI333596 | 2.00 | 0.0000058106 |
| kelch-like 9 (Drosophila)                                         | 9p22    | R61304   | 2.00 | 0.0008170343 |

**OTHER GENES OF BIOLOGIC SIGNIFICANCE (0.045>P-VALUE>0.01069)**

|                                                                                             |              |          |      | <b>P-VALUE&lt;0.045</b> |
|---------------------------------------------------------------------------------------------|--------------|----------|------|-------------------------|
| delta-like 1 (DLK1)                                                                         | 14q32.13     | U15979   | 7.64 | 0.0115700000            |
| insulin-like growth factor 2 (somatomedin A)                                                | 11p15.5      | J03242   | 6.71 | 0.0435177239            |
| Bicaudal D homolog 1 (Drosophila) (BICD1)                                                   | ---          | AA130857 | 3.87 | 0.0197199949            |
| PRIM1: Primase, polypeptide 1                                                               | ---          | AA831707 | 3.13 | 0.0286859706            |
| secreted phosphoprotein 2, 24kDa                                                            | 2q37-qter    | U20530   | 3.09 | 0.0120080512            |
| ficolin (collagen/fibrinogen domain containing) 3 (Hakata antigen)                          | 1p36.11      | D88587   | 3.01 | 0.0374420967            |
| cytochrome P450, family 3, subfamily A, polypeptide 7                                       | 7q21-q22.1   | D00408   | 2.98 | 0.0419050791            |
| Hermansky-Pudlak syndrome 3                                                                 | 3q24         | AA219354 | 2.75 | 0.0277720427            |
| v-maf musculoaponeurotic fibrosarcoma oncogene homolog F (avian)                            | 22q13.1      | AL021977 | 2.52 | 0.0235371422            |
| Similar to Kruppel-like factor 7 (ubiquitous); ubiquitous Kruppel-like transcription factor | 3q26.2       | T80868   | 2.48 | 0.0184916248            |
| lipase, hepatic                                                                             | 15q21-q23    | X07228   | 2.37 | 0.0208695829            |
| cytochrome P450, family 3, subfamily A, polypeptide 7                                       | 7q21-q22.1   | D00408   | 2.36 | 0.0392834721            |
| Brain expressed X-linked-like 1                                                             | Xq22.1-q22.3 | AL035494 | 2.30 | 0.0233413734            |
| ras homolog gene family, member B                                                           | 2p24         | M12174   | 2.26 | 0.0421167559            |
| FGL2: Fibrinogen-like 2                                                                     | ---          | AI432401 | 2.19 | 0.0315095133            |

|                                                                                   |                       |          |      |              |
|-----------------------------------------------------------------------------------|-----------------------|----------|------|--------------|
| complement component 1, q subcomponent, gamma polypeptide                         | 1p36.11               | AI193100 | 2.18 | 0.0267366061 |
| SPTBN1: Spectrin, beta, non-erythrocytic 1                                        | ---                   | T94862   | 2.13 | 0.0150509162 |
| hypothetical protein DKFZp434P162                                                 | 15q13.1               | AI620911 | 2.09 | 0.0154767399 |
| sex comb on midleg-like 2 (Drosophila) /// sex comb on midleg-like 1 (Drosophila) | xp22 /// xp22.2-p22.1 | AW022735 | 2.08 | 0.0422693708 |
| OTU domain, ubiquitin aldehyde binding 2                                          | 14q32.13              | H10030   | 2.06 | 0.0279499182 |
| hypothetical protein LOC149832                                                    | 20p13                 | AW016356 | 2.05 | 0.0411846001 |
| EIF2C2: Eukaryotic translation initiation factor 2C, 2                            | ---                   | AI942410 | 2.02 | 0.0190942628 |
| inhibitor of DNA binding 2, dominant negative helix-loop-helix protein            | 2p25                  | AA557557 | 2.02 | 0.0127808932 |
| afamin (New albumin gene 3' adjacent to the alpha 1-fetoprotein locus)            | 4q11-q13              | L32140   | 2.02 | 0.0359937233 |

## SUPPLEMENTAL TABLE 6

## GENES DECREASED IN HPBL VS. HCC

| Gene Name                                                                                 | Chromosome locus | GenBank # | HPBL/HCC | HPBL/HCC P value <0.01069 |
|-------------------------------------------------------------------------------------------|------------------|-----------|----------|---------------------------|
| interferon, alpha-inducible protein 27                                                    | 14q32            | AI991845  | 0.23     | 0.0004606865              |
| aldo-keto reductase family 1, member B10 (aldose reductase)                               | 7q33             | U37100    | 0.23     | 0.0000183474              |
| chitinase 3-like 1 (cartilage glycoprotein-39)                                            | 1q32.1           | Y08374    | 0.23     | 0.0089454398              |
| lectin, galactoside-binding, soluble, 4 (galectin 4)                                      | 19q13.2          | AB006781  | 0.24     | 0.0000023073              |
| osteopontin                                                                               | 4q21-q25         | J04765    | 0.25     | 0.0026621901              |
| Hypothetical LOC389048                                                                    | 2q21.1           | AA172056  | 0.33     | 0.0000198720              |
| ADRA1A: Adrenergic, alpha-1A-, receptor                                                   | ---              | W73851    | 0.35     | 0.0104266175              |
| Mature T-cell proliferation 1                                                             | Xq28             | AI769948  | 0.35     | 0.0000000040              |
| TRIM36: Tripartite motif-containing 36                                                    | ---              | AA398338  | 0.36     | 0.0000000098              |
| cut-like 2 (Drosophila)                                                                   | 12q24.11-q24.12  | AB006631  | 0.37     | 0.0000635269              |
| Zinc finger protein 322B                                                                  | 9q22.33          | AI971103  | 0.37     | 0.0000000089              |
| eukaryotic translation elongation factor 1 alpha 2                                        | 20q13.3          | L10340    | 0.37     | 0.0024320201              |
| cytochrome P450, family 1, subfamily B, polypeptide 1                                     | 2p21             | U03688    | 0.38     | 0.0004808591              |
| hemochromatosis type 2 (juvenile)                                                         | 1q21.1           | AA948096  | 0.39     | 0.0015679671              |
| RALBP1 associated Eps domain containing 1                                                 | ---              | H02904    | 0.41     | 0.0000000107              |
| Zinc finger protein 291                                                                   | 15q24            | N47807    | 0.41     | 0.0000000270              |
| Transcribed locus, weakly similar to XP_375099.1                                          | ---              | AA040039  | 0.42     | 0.0016219506              |
| hypothetical protein LOC283585 [Homo sapiens]                                             | ---              | AA040039  | 0.42     | 0.0016219506              |
| ubiquilin (ubiquitin-like) 2                                                              | xp11.23-p11.1    | AI190896  | 0.42     | 0.0000206437              |
| Kinase interacting with leukemia-associated gene (stathmin)                               | 1q23.3           | AI765553  | 0.42     | 0.0005322896              |
| EGLN1: Egl nine homolog 1 (C. elegans)                                                    | ---              | AI208803  | 0.42     | 0.0000000308              |
| DnaJ (Hsp40) homolog, subfamily B, member 11                                              | 3q27.3           | AI819362  | 0.42     | 0.0000000096              |
| Immunoglobulin J polypeptide, linker protein for immunoglobulin alpha and mu polypeptides | 4q21             | AI660656  | 0.43     | 0.0096696567              |
| myosin, light polypeptide kinase                                                          | 3q21             | AA526844  | 0.43     | 0.0014652567              |
| KLHL6: Kelch-like 6 (Drosophila)                                                          | ---              | AI024669  | 0.43     | 0.0000000380              |
| UDP glycosyltransferase 2 family, polypeptide B17                                         | 4q13             | U59209    | 0.44     | 0.0040834299              |

|                                                                                          |             |          |      |              |
|------------------------------------------------------------------------------------------|-------------|----------|------|--------------|
| cytochrome P450, family 1, subfamily B, polypeptide 1                                    | 2p21        | U03688   | 0.44 | 0.0013519903 |
| transmembrane protein 14A                                                                | 6p12.3      | W84548   | 0.44 | 0.0004592319 |
| glutathione peroxidase 2 (gastrointestinal)                                              | 14q24.1     | X53463   | 0.44 | 0.0003670465 |
| HEAT repeat containing 1                                                                 | ---         | AI880842 | 0.44 | 0.0000003720 |
| DEP domain containing 6                                                                  | 8q24.12     | AI799804 | 0.44 | 0.0000000002 |
| hypothetical protein DKFZp762C1112                                                       | 8q21.3      | AI422867 | 0.44 | 0.0024055656 |
| PDE6A: Phosphodiesterase 6A, cGMP-specific, rod, alpha                                   | ---         | C20707   | 0.45 | 0.0000003736 |
| synaptotagmin VII                                                                        | 11q12-q13.1 | AI554660 | 0.45 | 0.0005471215 |
| MBNL2: Muscleblind-like 2 (Drosophila)                                                   | ---         | AA885123 | 0.45 | 0.0000022916 |
| CDNA clone IMAGE:6167132, partial cds                                                    | ---         | N52198   | 0.45 | 0.0000000760 |
| SOX17: SRY (sex determining region Y)-box 17                                             | ---         | AI821669 | 0.45 | 0.0000063847 |
| chromosome 17 open reading frame 27                                                      | 17q25.3     | AI655728 | 0.45 | 0.0002074674 |
| PRO0149 protein                                                                          | 16p13.2     | AW044607 | 0.46 | 0.0000000154 |
| armadillo repeat containing 1                                                            | 8q13.1      | AL110454 | 0.46 | 0.0009731269 |
| Microtubule-associated protein 2                                                         | 2q34-q35    | AA167714 | 0.46 | 0.0000731971 |
| senescence downregulated leo1-like                                                       | 15q21.2     | AA074729 | 0.46 | 0.0000000235 |
| transmembrane protein 16A                                                                | 11q13.3     | AI703454 | 0.46 | 0.0000059670 |
| Transcribed locus, weakly similar to NP_079012.2                                         |             |          |      |              |
| gasdermin domain containing 1 [Homo sapiens]                                             | ---         | AA142976 | 0.47 | 0.0052556217 |
| similar to CDC10                                                                         | ---         | AI298966 | 0.47 | 0.0000024168 |
| CDNA: FLJ23131 fis, clone LNG08502                                                       | ---         | W44633   | 0.47 | 0.0000127147 |
| hypothetical protein FLJ23834                                                            | 7q22.3      | AA974855 | 0.47 | 0.0000003093 |
| hypothetical protein LOC286359                                                           | 9q22.33     | AI027273 | 0.47 | 0.0000041186 |
| LYRIC/3D3                                                                                | 8q22.1      | AA398463 | 0.47 | 0.0000000002 |
| geminin, DNA replication inhibitor                                                       | 6p22.2      | AI968057 | 0.47 | 0.0002215481 |
| GPP34-related protein                                                                    | 1q21.2      | AI804436 | 0.47 | 0.0000155005 |
| Calpain 12                                                                               | 19q13.2     | AI168605 | 0.48 | 0.0000000238 |
| RAB GTPase activating protein 1-like                                                     | ---         | H48933   | 0.48 | 0.0000000192 |
| mannosyl (alpha-1,3-)-glycoprotein beta-1,4-N-acetylglucosaminyltransferase, isoenzyme B | 5q35        | AI741591 | 0.48 | 0.0000220904 |
| FLJ16030 protein                                                                         | 1p34.2      | AI653297 | 0.48 | 0.0000000604 |
| CDNA FLJ33492 fis, clone BRAMY2003681                                                    | ---         | AA398544 | 0.49 | 0.0000007227 |
| membrane-associated protein 17                                                           | 1p33        | AI749525 | 0.49 | 0.0001184959 |

|                                                                                                |               |          |      |              |
|------------------------------------------------------------------------------------------------|---------------|----------|------|--------------|
| CDNA: FLJ22256 fis, clone HRC02860                                                             | ---           | R89028   | 0.49 | 0.0000001406 |
| transmembrane 4 superfamily member 3                                                           | 12q14.1-q21.1 | M35252   | 0.49 | 0.0071245163 |
| stromal cell-derived factor 2-like 1                                                           | 22q11.21      | AI927836 | 0.49 | 0.0000000197 |
| NAD(P)H dehydrogenase, quinone 1                                                               | 16q22.1       | M81600   | 0.49 | 0.0046321066 |
| PEX14: Peroxisomal biogenesis factor 14                                                        | ---           | AI291049 | 0.49 | 0.0000000301 |
| hypothetical protein LOC284244                                                                 | 18q12.1       | AF070541 | 0.49 | 0.0000011813 |
| acid acyltransferase-epsilon                                                                   | 8p23.1        | AA056538 | 0.49 | 0.0042168044 |
| Immunoglobulin lambda constant 2 (Kern-Oz- marker)                                             | 22q11.2       | AF043586 | 0.50 | 0.0000594687 |
| UDP-N-acetyl-alpha-D-galactosamine:polypeptide N-acetylgalactosaminyltransferase 3 (GalNAc-T3) | 2q24-q31      | X92689   | 0.50 | 0.0000012623 |
| interferon, alpha-inducible protein 27                                                         | 14q32         | X67325   | 0.50 | 0.0019156894 |
| KIAA1598                                                                                       | 10q25.3       | AI744645 | 0.50 | 0.0000969389 |
| Ropporin, rhopilin associated protein 1                                                        | 3q21.1        | AL079759 | 0.50 | 0.0000005776 |
| ERO1-like (S. cerevisiae)                                                                      | 14q22.1       | AI742422 | 0.50 | 0.0000308840 |
| Zinc finger protein 322B                                                                       | 9q22.33       | AA523657 | 0.50 | 0.0000006386 |
| TRNT1: TRNA nucleotidyl transferase, CCA-adding, 1                                             | ---           | R91427   | 0.50 | 0.0000000000 |

## SUPPLEMENTAL TABLE 7

## GENES INCREASED IN CLUSTER A VS. B

| Gene Name                                                                         | Chromosome locus | Unigene # | RATIO<br>A/B | P VALUE<br>A/B<0.00117 |
|-----------------------------------------------------------------------------------|------------------|-----------|--------------|------------------------|
| GABA transporter 1 (GAT1)                                                         | 3p25-p24         | AI003579  | 3.16         | 0.0000069406           |
| apobec-1 complementation factor                                                   | 10q11.23         | T78476    | 2.72         | 0.0002318619           |
| kininogen 1                                                                       | 3q27             | M11437    | 2.57         | 0.0000140889           |
| transcription elongation factor A (SII), 3                                        | 1p36.12          | AA873235  | 2.51         | 0.0000199372           |
| checkpoint suppressor 1                                                           | 14q24.3-q32.11   | U68723    | 2.49         | 0.0004609957           |
| chromosome 10 open reading frame 58                                               | 10q22.3          | AA127810  | 2.48         | 0.0011252955           |
| Erb-B3                                                                            | 12q13            | AI565773  | 2.35         | 0.0005635270           |
| glucose-6-phosphatase                                                             | 17q21            | U01120    | 2.30         | 0.0000371943           |
| Mitogen-activated protein kinase kinase kinase 2                                  | 2q14.3           | AI125541  | 2.20         | 0.0006127848           |
| acyl-Coenzyme A oxidase 1, palmitoyl                                              | 17q24-17q25      | S69189    | 2.18         | 0.0005146575           |
| ATP-binding cassette, sub-family C (CFTR/MRP), member 6                           | 16p13.1          | U66689    | 2.17         | 0.0000903006           |
| bile acid Coenzyme A: amino acid N-acyltransferase (glycine N-choloyltransferase) | 9q22.3           | L34081    | 2.15         | 0.0002419904           |
| cytochrome P450, family 3, subfamily A, polypeptide 5                             | 7q21.1           | J04813    | 2.14         | 0.0003990136           |
| chromosome 10 open reading frame 58                                               | 10q22.3          | AI589570  | 2.10         | 0.0000857447           |
| ankyrin repeat domain 15                                                          | 9p24.3           | D79994    | 2.09         | 0.0009150277           |
| pleckstrin and Sec7 domain containing 3                                           | 8pter-p23.3      | AW015495  | 2.08         | 0.0005384379           |
| aldehyde dehydrogenase 3 family, member A2                                        | 17p11.2          | U46689    | 2.08         | 0.0006250162           |
| <b>OTHER GENES OF BIOLOGIC SIGNIFICANCE (0.04&gt;P-VALUE&gt;0.00117</b>           |                  |           |              | <b>P-VALUE&lt;0.02</b> |
| cytochrome P450, family 7, subfamily A, polypeptide 1                             | 8q11-q12         | M93133    | 6.82         | 0.0217036793           |
| glycerol-3-phosphate acyltransferase, mitochondrial                               | 10q25.2          | AI934361  | 3.94         | 0.0231947333           |
| cytochrome P450, family 3, subfamily A, polypeptide 4                             | 7q21.1           | J04449    | 3.69         | 0.0040865500           |
| Paternally expressed 10                                                           | 7q21             | AB028974  | 3.69         | 0.0352837896           |
| glial high affinity glutamate transporter, member 2                               | 11p13-p12        | AW005111  | 2.98         | 0.0036559913           |
| insulin receptor substrate 1 (IRS1)                                               | 2q36             | S85963    | 2.82         | 0.0015252748           |

|                                                                                                                                            |              |          |      |              |
|--------------------------------------------------------------------------------------------------------------------------------------------|--------------|----------|------|--------------|
| UDP glycosyltransferase 2 family, polypeptide B17                                                                                          | 4q13         | U59209   | 2.73 | 0.0093112841 |
| LIM domain 7                                                                                                                               | 13q22.2      | AA100793 | 2.55 | 0.0044695161 |
| glutamate-cysteine ligase, catalytic subunit                                                                                               | 6p12         | N47894   | 2.50 | 0.0012046468 |
| Alcohol dehydrogenase IB (class I), beta polypeptide                                                                                       | 4q21-q23     | AA708155 | 2.47 | 0.0082192957 |
| cytochrome P450, family 3, subfamily A, polypeptide 7                                                                                      | 7q21-q22.1   | D00408   | 2.47 | 0.0014214275 |
| alcohol dehydrogenase 6 (class V)                                                                                                          | 4q23         | X63359   | 2.39 | 0.0077438123 |
| transmembrane protein 14A                                                                                                                  | 6p12.3       | W84548   | 2.37 | 0.0035002905 |
| nuclear factor I/A                                                                                                                         | 1p31.3-p31.2 | AI750575 | 2.36 | 0.0018488175 |
| phosphoribosyl pyrophosphate synthetase-associated protein 1                                                                               | 17q24-q25    | D61391   | 2.35 | 0.0035949947 |
| peroxisomal D3,D2-enoyl-CoA isomerase                                                                                                      | 6p24.3       | AI564314 | 2.35 | 0.0012222229 |
| PDZ domain containing 1                                                                                                                    | 1q21         | AF012281 | 2.33 | 0.0035335918 |
| armadillo repeat containing 1                                                                                                              | 8q13.1       | AL110454 | 2.33 | 0.0033871380 |
| Zinc finger protein 281                                                                                                                    | 1q32.1       | AI796083 | 2.33 | 0.0043431974 |
| UDP glycosyltransferase 2 family, polypeptide B17                                                                                          | 4q13         | U59209   | 2.33 | 0.0276288815 |
| glutathione S-transferase A2                                                                                                               | 6p12.1       | M16594   | 2.33 | 0.0080702781 |
| ring finger protein 128                                                                                                                    | xq22.3       | AI569980 | 2.25 | 0.0248967399 |
| dipeptidylpeptidase 4 (CD26, adenosine deaminase complexing protein 2)                                                                     | 2q24.3       | X60708   | 2.23 | 0.0060494370 |
| Transcribed locus, weakly similar to XP_375099.1 hypothetical protein LOC283585 [Homo sapiens]                                             | ---          | AA040039 | 2.22 | 0.0337114195 |
| hemochromatosis type 2 (juvenile)                                                                                                          | 1q21.1       | AA948096 | 2.21 | 0.0047648034 |
| dicarbonyl/L-xylulose reductase                                                                                                            | 17q25.3      | AI382182 | 2.21 | 0.0120478600 |
| Immunoglobulin superfamily, member 4                                                                                                       | 11q23.2      | AL080181 | 2.20 | 0.0022241441 |
| NAD(P)H dehydrogenase, quinone 1                                                                                                           | 16q22.1      | M81600   | 2.16 | 0.0328150487 |
| emopamil binding protein-like                                                                                                              | 13q12-q13    | AI858023 | 2.16 | 0.0039792506 |
| 3-hydroxy-3-methylglutaryl-Coenzyme A synthase 1 (soluble)                                                                                 | 5p14-p13     | AL048840 | 2.15 | 0.0056963187 |
| metastasis suppressor 1                                                                                                                    | 8p22         | AB007889 | 2.15 | 0.0024933541 |
| aldo-keto reductase family 1, member C4 (chlordecone reductase; 3-alpha hydroxysteroid dehydrogenase, type I; dihydrodiol dehydrogenase 4) | 10p15-p14    | M33375   | 2.13 | 0.0048617526 |
| CDNA: FLJ22642 fis, clone HSI06970                                                                                                         | ---          | AI700633 | 2.12 | 0.0068885540 |
| microsomal triglyceride transfer protein (large polypeptide, 88kDa)                                                                        | 4q24         | X91148   | 2.11 | 0.0019859427 |
| aldehyde dehydrogenase 5 family, member A1 (succinate-semialdehyde dehydrogenase)                                                          | 6p22.2-p22.3 | AL031230 | 2.11 | 0.0179278309 |

|                                                                        |                  |          |      |              |
|------------------------------------------------------------------------|------------------|----------|------|--------------|
| nuclear ubiquitous casein kinase and cyclin-dependent kinase substrate | 1q32.1           | T62753   | 2.10 | 0.0042172952 |
| sorbitol dehydrogenase                                                 | 15q15.3          | L29254   | 2.10 | 0.0014126633 |
| 3-hydroxysteroid epimerase                                             | 12q13            | U89281   | 2.10 | 0.0052990662 |
| glutamate-cysteine ligase, catalytic subunit                           | 6p12             | AI971137 | 2.10 | 0.0070197442 |
| alcohol dehydrogenase 1A (class I), alpha polypeptide                  | 4q21-q23         | M12963   | 2.09 | 0.0376757055 |
| chromosome 6 open reading frame 97                                     | 6q25.1           | AI734267 | 2.09 | 0.0209332286 |
| phosphoserine phosphatase                                              | 7p15.2-p15.1     | Y10275   | 2.06 | 0.0244312186 |
| leukocyte cell-derived chemotaxin 2                                    | 5q31.1-q32       | D63521   | 2.05 | 0.0017713747 |
| myotubularin related protein 4                                         | 17q22-q23        | AB014547 | 2.05 | 0.0058549400 |
| membrane-associated RING-CH protein VI                                 | 5p15.2           | AB011169 | 2.02 | 0.0022853495 |
|                                                                        | xp11.4-p11.2 /// |          |      |              |
| G antigen 8 /// G antigen 2 /// G antigen 1                            | xp11.23          | U19142   | 2.02 | 0.0083730353 |
| WW domain containing E3 ubiquitin protein ligase 1                     | 8q21             | U96113   | 2.02 | 0.0061768211 |
| Solute carrier family 25, member 29                                    | 14q32.2          | AA610175 | 2.01 | 0.0365618757 |
| interferon-induced protein with tetratricopeptide repeats 1            | 10q25-q26        | M24594   | 2.01 | 0.0039989813 |
| period homolog 3 (Drosophila)                                          | 1p36.23          | AA161496 | 2.00 | 0.0033203108 |
| chromosome 9 open reading frame 5                                      | 9q31             | AI684486 | 2.00 | 0.0368756359 |
| nuclear receptor subfamily 4, group A, member 3                        | 9q22             | U12767   | 2.00 | 0.0156033922 |



## SUPPLEMENTAL TABLE 8

## GENES DECREASED IN HCC CLUSTER A VS. CLUSTER B

| Gene Name                                                                                         | Chromosome locus | GenBank # | RATIO A/B | P<br>VALUE<0.00117      |
|---------------------------------------------------------------------------------------------------|------------------|-----------|-----------|-------------------------|
| C-reactive protein, pentraxin-related<br>TIMP-1                                                   | 1q21-q23         | X56692    | 0.25      | 0.0010991291            |
| RAS, dexamethasone-induced 1                                                                      | xp11.3-p11.23    | D11139    | 0.28      | 0.0000000326            |
| Fc fragment of IgG, low affinity IIa, receptor for (CD32)                                         | 17p11.2          | A1968384  | 0.30      | 0.0006040517            |
| 6-phosphofructo-2-kinase/fructose-2,6-biphosphatase 3                                             | 1q23             | M31932    | 0.32      | 0.0003886579            |
| hypothetical protein DKFZp434B044                                                                 | 10p14-p15        | A1765775  | 0.34      | 0.0005417389            |
| DNA-damage-inducible transcript 4                                                                 | 16q24.1          | A1535730  | 0.34      | 0.0002362676            |
| proteoglycan 1, secretory granule<br>ADAM metallopeptidase with thrombospondin type 1 motif,<br>1 | 10pter-q26.12    | AW015428  | 0.34      | 0.0006275021            |
| collagen, type IV, alpha 1                                                                        | 10q22.1          | X17042    | 0.38      | 0.0002084695            |
| interferon, gamma-inducible protein 16                                                            | 21q21.2          | A1810627  | 0.39      | 0.0001785133            |
| insulin-like growth factor binding protein 7                                                      | 13q34            | M11315    | 0.44      | 0.0002031832            |
| endothelial differentiation, sphingolipid G-protein-coupled<br>receptor, 3                        | 1q22             | M63838    | 0.44      | 0.0000312833            |
| UDP-glucose ceramide glucosyltransferase                                                          | 4q12             | L19182    | 0.44      | 0.0005439604            |
| adrenomedullin                                                                                    | 9q22.1-q22.2     | AA149845  | 0.45      | 0.0003460972            |
| transmembrane 4 superfamily member 1                                                              | 9q31             | W72338    | 0.46      | 0.0001634680            |
| HIF1 alpha                                                                                        | 11p15.4          | D14874    | 0.46      | 0.0007827728            |
| GTP binding protein overexpressed in skeletal muscle                                              | 3q21-q25         | A1445461  | 0.46      | 0.0000478726            |
| transmembrane 4 superfamily member 1                                                              | 14q21-q24        | U22431    | 0.47      | 0.0001203476            |
| vimentin                                                                                          | 8q13-q21         | U10550    | 0.47      | 0.0007195899            |
| collagen, type VI, alpha 2                                                                        | 3q21-q25         | M90657    | 0.50      | 0.0000445029            |
|                                                                                                   | 10p13            | M14144    | 0.50      | 0.0005944523            |
|                                                                                                   | 21q22.3          | X15882    | 0.50      | 0.0000951248            |
| <b>OTHER GENES OF BIOLOGIC SIGNIFICANCE<br/>(0.04&gt;P-VALUE&gt;0.00117)</b>                      |                  |           |           | <b>P-VALUE&lt;0.004</b> |
| chemokine (C-C motif) ligand 7                                                                    | 17q11.2-q12      | X72308    | 0.18      | 0.0021677482            |

|                                                                                                    |               |          |      |              |
|----------------------------------------------------------------------------------------------------|---------------|----------|------|--------------|
| regulator of G-protein signalling 2, 24kDa                                                         | 1q31          | L13463   | 0.25 | 0.0029116812 |
| suppressor of cytokine signaling 3                                                                 | 17q25.3       | AI680350 | 0.25 | 0.0031724985 |
| Hypothetical LOC387763                                                                             | 11p11.2       | AW001427 | 0.32 | 0.0016098195 |
| methylene tetrahydrofolate dehydrogenase (NAD+ dependent), methenyltetrahydrofolate cyclohydrolase | 2p13.1        | X16396   | 0.35 | 0.0020875143 |
| SOCS 3 (suppressor of cytokine signaling 3)                                                        | 17q25.3       | AI244908 | 0.36 | 0.0039003029 |
| transglutaminase 2 (C polypeptide, protein-glutamine-gamma-glutamyltransferase)                    | 20q12         | M55153   | 0.36 | 0.0026570994 |
| jun B proto-oncogene                                                                               | 19p13.2       | M29039   | 0.37 | 0.0020085329 |
| thymosin, beta 10                                                                                  | 2p11.2        | AA417033 | 0.39 | 0.0025738484 |
| complement component 7                                                                             | 5p13          | J03507   | 0.39 | 0.0037438594 |
| insulin-like growth factor binding protein 5                                                       | 2q33-q36      | L27560   | 0.39 | 0.0014035038 |
| cold shock domain protein A                                                                        | 12p13.1       | M24069   | 0.40 | 0.0013905954 |
| immediate early response 3                                                                         | 6p21.3        | S81914   | 0.40 | 0.0023629963 |
| cytochrome P450, family 1, subfamily B, polypeptide 1                                              | 2p21          | U03688   | 0.43 | 0.0019217561 |
| DNA-damage-inducible transcript 4                                                                  | 10pter-q26.12 | AA618602 | 0.44 | 0.0028931311 |
| Growth arrest and DNA-damage-inducible, beta                                                       | 19p13.3       | AF078077 | 0.45 | 0.0018280021 |
| phosphodiesterase 4B, cAMP-specific (phosphodiesterase E4 dunce homolog, Drosophila)               | 1p31          | L20971   | 0.47 | 0.0020348715 |
| nicotinamide N-methyltransferase                                                                   | 11q23.1       | U08021   | 0.47 | 0.0014650268 |
| v-maf musculoaponeurotic fibrosarcoma oncogene homolog F (avian)                                   | 22q13.1       | AL021977 | 0.47 | 0.0033264086 |
| metallothionein 1H                                                                                 | 16q13         | R93527   | 0.48 | 0.0028008904 |
| prostaglandin D2 synthase 21kDa (brain)                                                            | 9q34.2-q34.3  | M98539   | 0.49 | 0.0015819456 |
| chemokine (C-X-C motif) ligand 1 (melanoma growth stimulating activity, alpha)                     | 4q21          | X54489   | 0.50 | 0.0012834706 |
